# Supplementary material
Source: PubMed Central journal article supplement (PMC2663616)
Supplement: 2008.000919_1.pdf [file 2008.000919_1.pdf]

# Genetic similarity of chromosome 6 between patients receiving hematopoietic stem cell transplantation and HLA matched sibling donors

Hannu Turpeinen,<sup>1</sup> Liisa Volin,<sup>2</sup> Lauri Nikkinen,<sup>3</sup> Pauli Ojala,<sup>1</sup> Aarno Palotie,<sup>4,8</sup> Janna Saarela,<sup>5,9</sup> and Jukka Partanen<sup>1</sup>

<sup>1</sup>Research and Development, Finnish Red Cross Blood Service, Helsinki, Finland; <sup>2</sup>Department of Medicine, Helsinki University Central Hospital, Helsinki, Finland; <sup>3</sup>Blood Component Expertise, Finnish Red Cross Blood Service, Helsinki, Finland; <sup>4</sup>Department of Clinical Chemistry, University of Helsinki, Finland; <sup>5</sup>The Finnish Institute for Molecular Medicine (FIMM); <sup>6</sup>Finnish Genome Center, University of Helsinki, Finland; <sup>7</sup>The Wellcome Trust Sanger Institute, Hinxton, Cambridge, UK; <sup>8</sup>The Broad Institute of MIT and Harvard, Cambridge, MA, USA, and <sup>9</sup>Department of Molecular Medicine, National Public Health Institute, Helsinki, Finland

**Online Supplementary Table S1.** The detailed clinical characteristics for patients in the study.

| Pair | Disease                        | Graft type | Conditioning      |
|------|--------------------------------|------------|-------------------|
| 1    | acute lymphoblastic leukemia   | PB         | myeloablative     |
| 2    | acute myelogenous leukemia     | PB         | myeloablative     |
| 3    | acute myelogenous leukemia     | BM         | myeloablative     |
| 4    | non-Hodgkin lymphoma           | PB         | non-myeloablative |
| 5    | chronic lymphoblastic leukemia | PB         | non-myeloablative |
| 6    | myelofibrosis                  | BM         | myeloablative     |
| 7    | non-Hodgkin lymphoma           | PB         | non-myeloablative |
| 8    | acute myelogenous leukemia     | BM         | myeloablative     |
| 9    | acute myelogenous leukemia     | BM         | myeloablative     |
| 10   | acute lymphoblastic leukemia   | BM         | myeloablative     |
| 11   | acute lymphoblastic leukemia   | BM         | myeloablative     |
| 12   | chronic myelogenous leukemia   | PB         | myeloablative     |
| 13   | multiple myeloma               | PB         | non-myeloablative |
| 14   | acute lymphoblastic leukemia   | BM         | myeloablative     |
| 15   | chronic myelogenous leukemia   | BM         | myeloablative     |
| 16   | acute lymphoblastic leukemia   | BM         | myeloablative     |
| 17   | multiple myeloma               | BM         | myeloablative     |
| 18   | multiple myeloma               | BM         | myeloablative     |
| 19   | multiple myeloma               | PB         | non-myeloablative |
| 20   | acute lymphoblastic leukemia   | PB         | myeloablative     |
| 21   | multiple myeloma               | PB         | non-myeloablative |
| 22   | chronic myelogenous leukemia   | BM         | myeloablative     |
| 23   | chronic myelogenous leukemia   | PB         | myeloablative     |
| 24   | multiple myeloma               | BM         | myeloablative     |
| 25   | chronic myelogenous leukemia   | BM         | myeloablative     |
| 26   | acute myelogenous leukemia     | PB         | myeloablative     |
| 27   | chronic myelogenous leukemia   | BM         | myeloablative     |
| 28   | acute lymphoblastic leukemia   | BM         | myeloablative     |
| 29   | myelodysplastic syndrome       | PB         | myeloablative     |
| 30   | myelodysplastic syndrome       | PB         | myeloablative     |
| 31   | multiple myeloma               | BM         | myeloablative     |
| 32   | chronic myelogenous leukemia   | BM         | myeloablative     |
| 33   | multiple myeloma               | PB         | non-myeloablative |

**Online Supplementary Table S2.** Genes mapped to the longest and shortest IBS regions around HLA genes among 33 sibling pairs (Refer to corresponding Turpeinen Suppl Table 2.pdf file).

**Online Supplementary Table S3.** Statistically significant genotypic case-control associations observed. All nominally ( $p < 0.05$ ) statistically significant results for patients' and donors' genotypes as well as for GvH directed patient-donor differences versus acute and chronic GvHD are displayed (Refer to corresponding Turpeinen Suppl Table 3.pdf file).

A

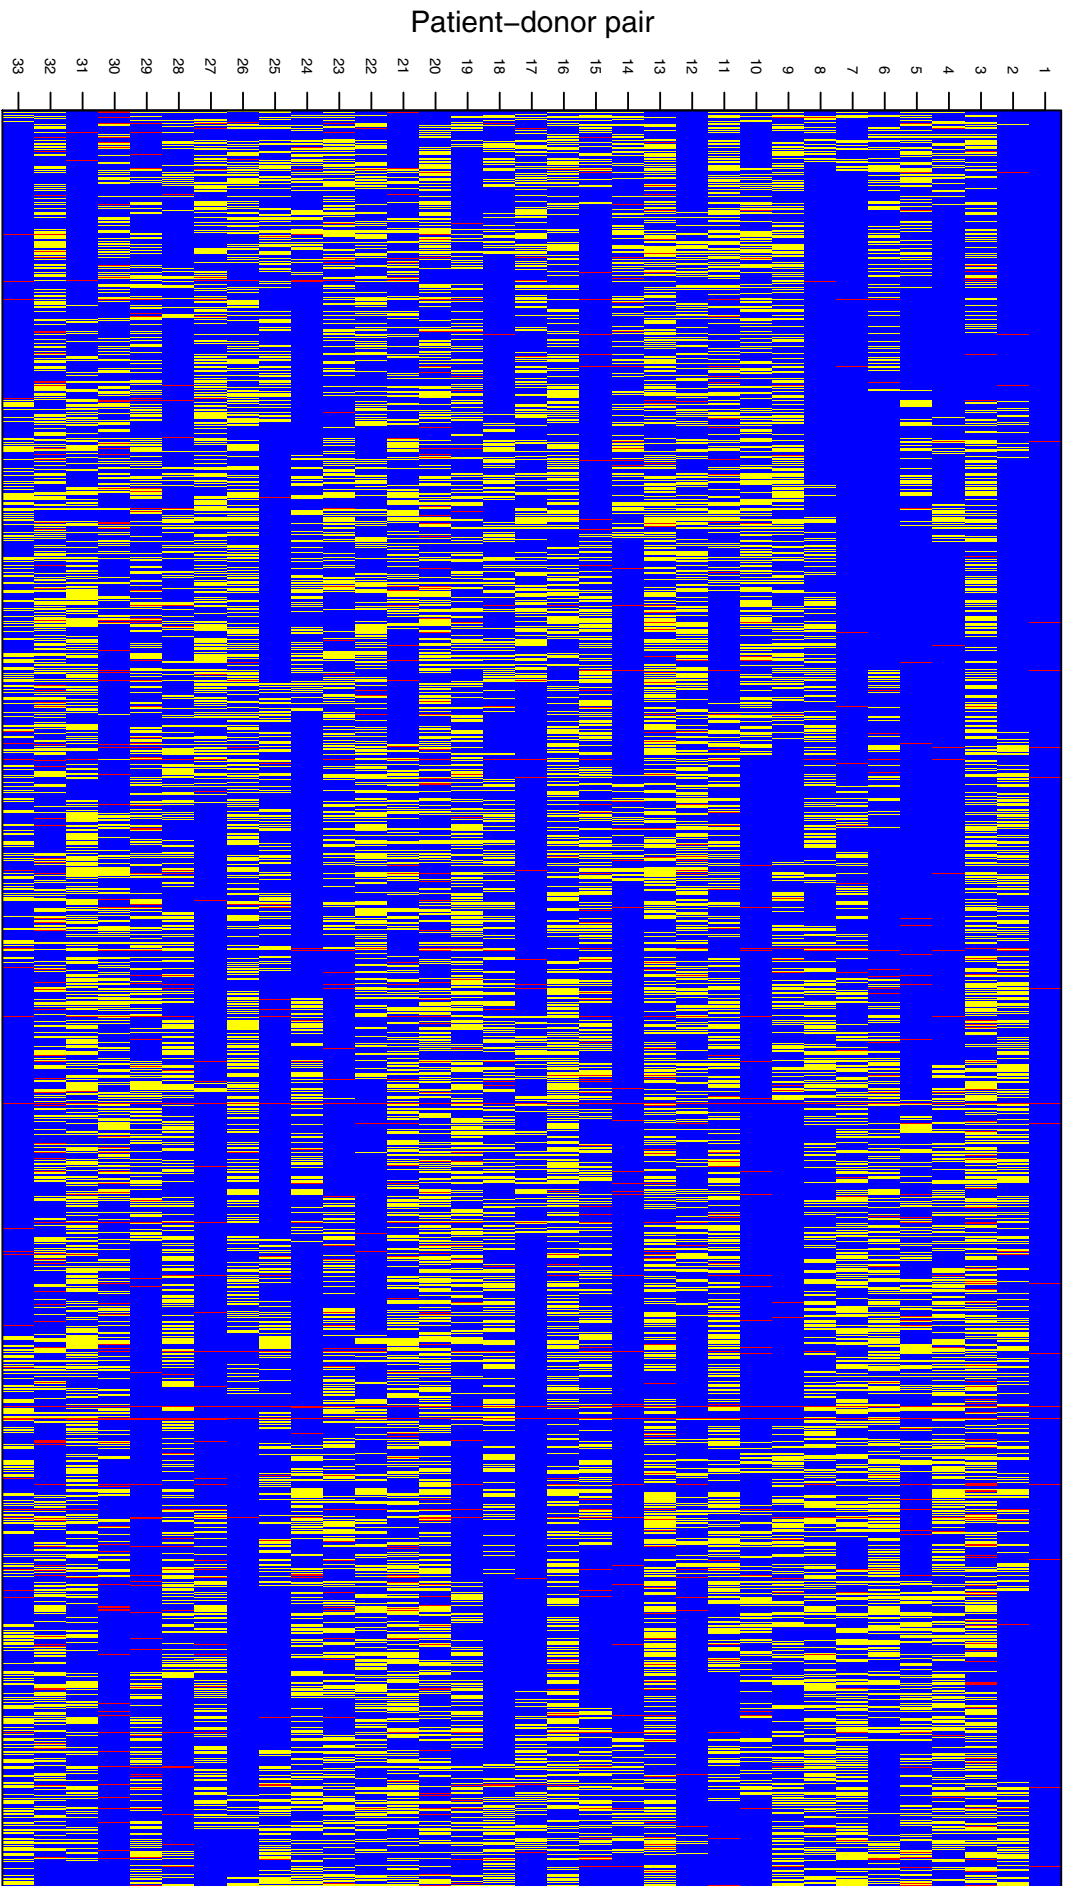

**B**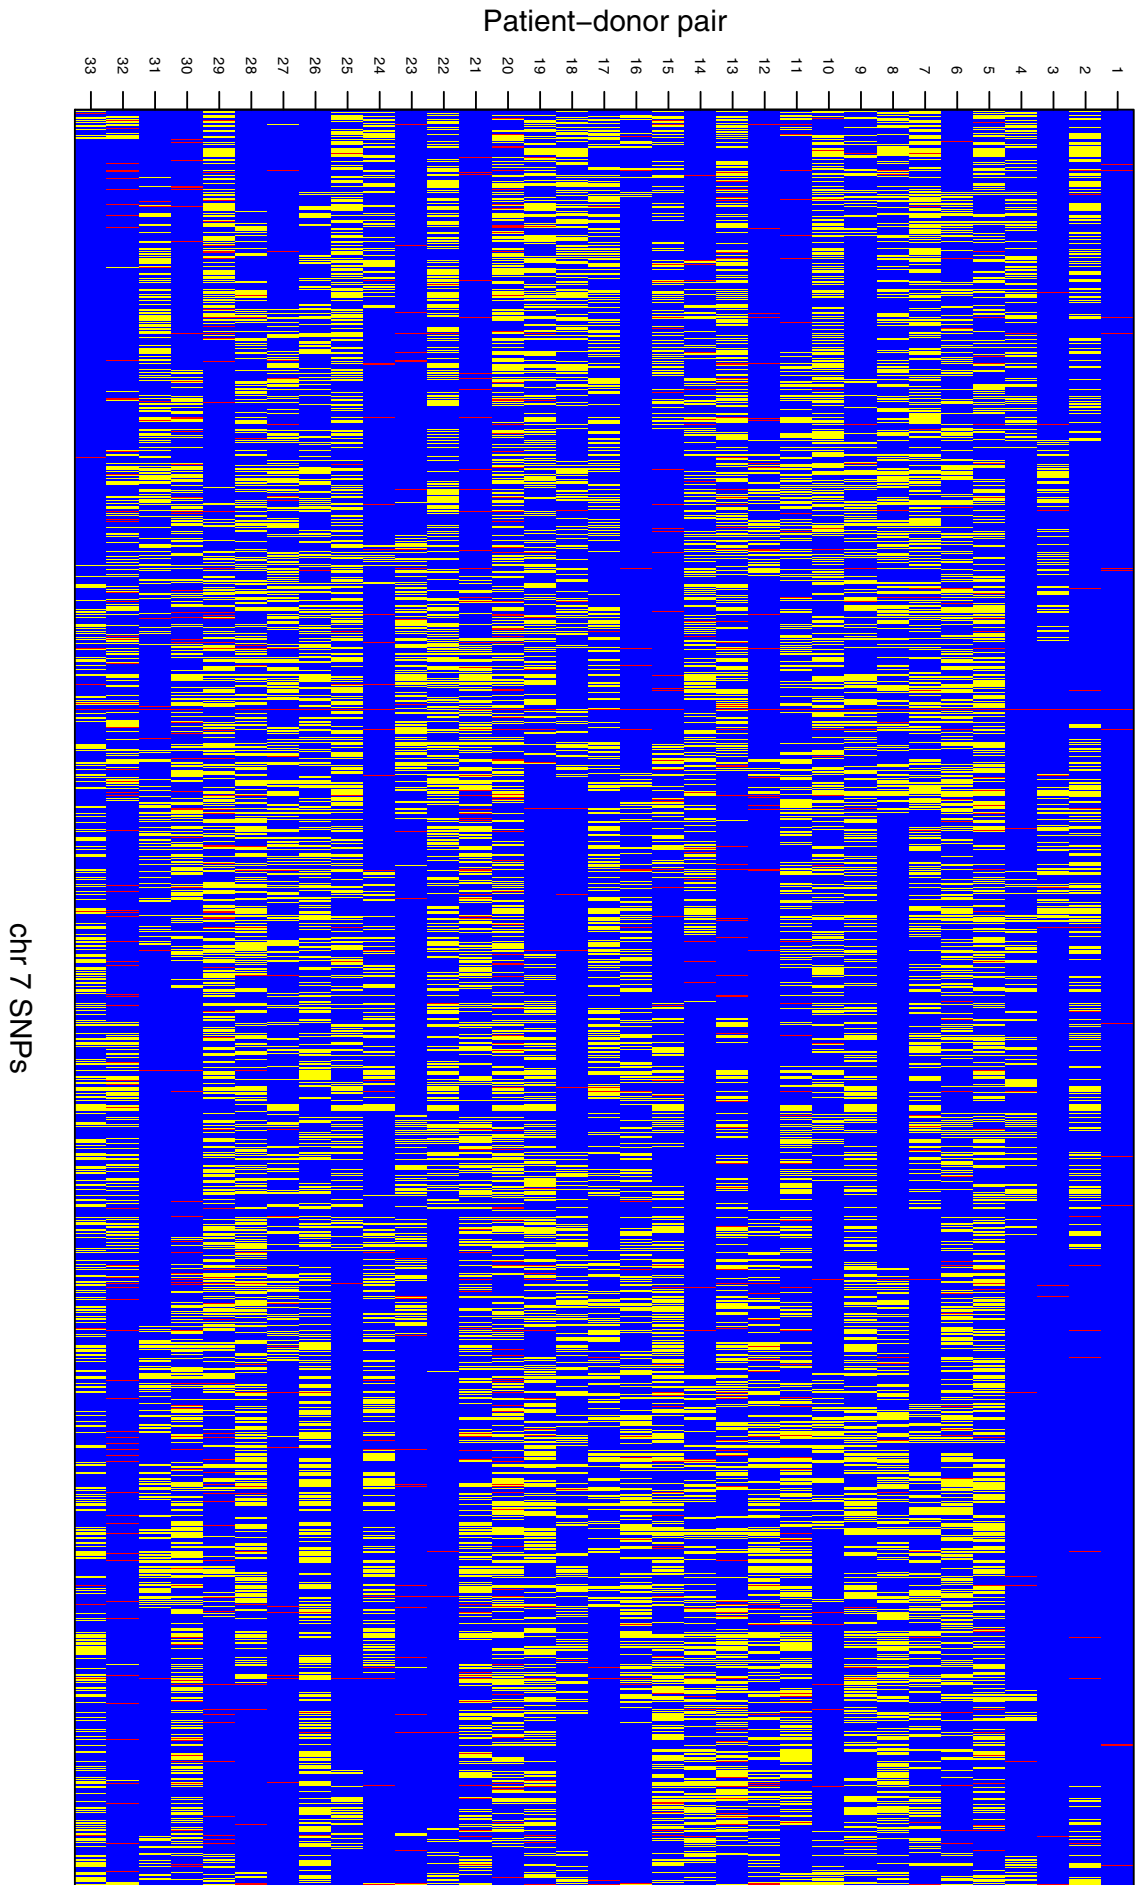

Online Supplementary Figures S1A and S1B. The SNPs on chromosome 5 (a) and 7 (b) IBS between HSCT sibling pairs. Blue stripes represent similar genotypes and yellow stripes different genotypes between siblings. Red stripes are SNPs where genotyping of either patient or donor was not successful and thus no similarity could be determined. Note: Markers in Figure S1a and S1b are not in physical scale; i.e. each blue, yellow or red stripe represents one SNP, and the distance between neighboring SNPs differs along the chromosome.

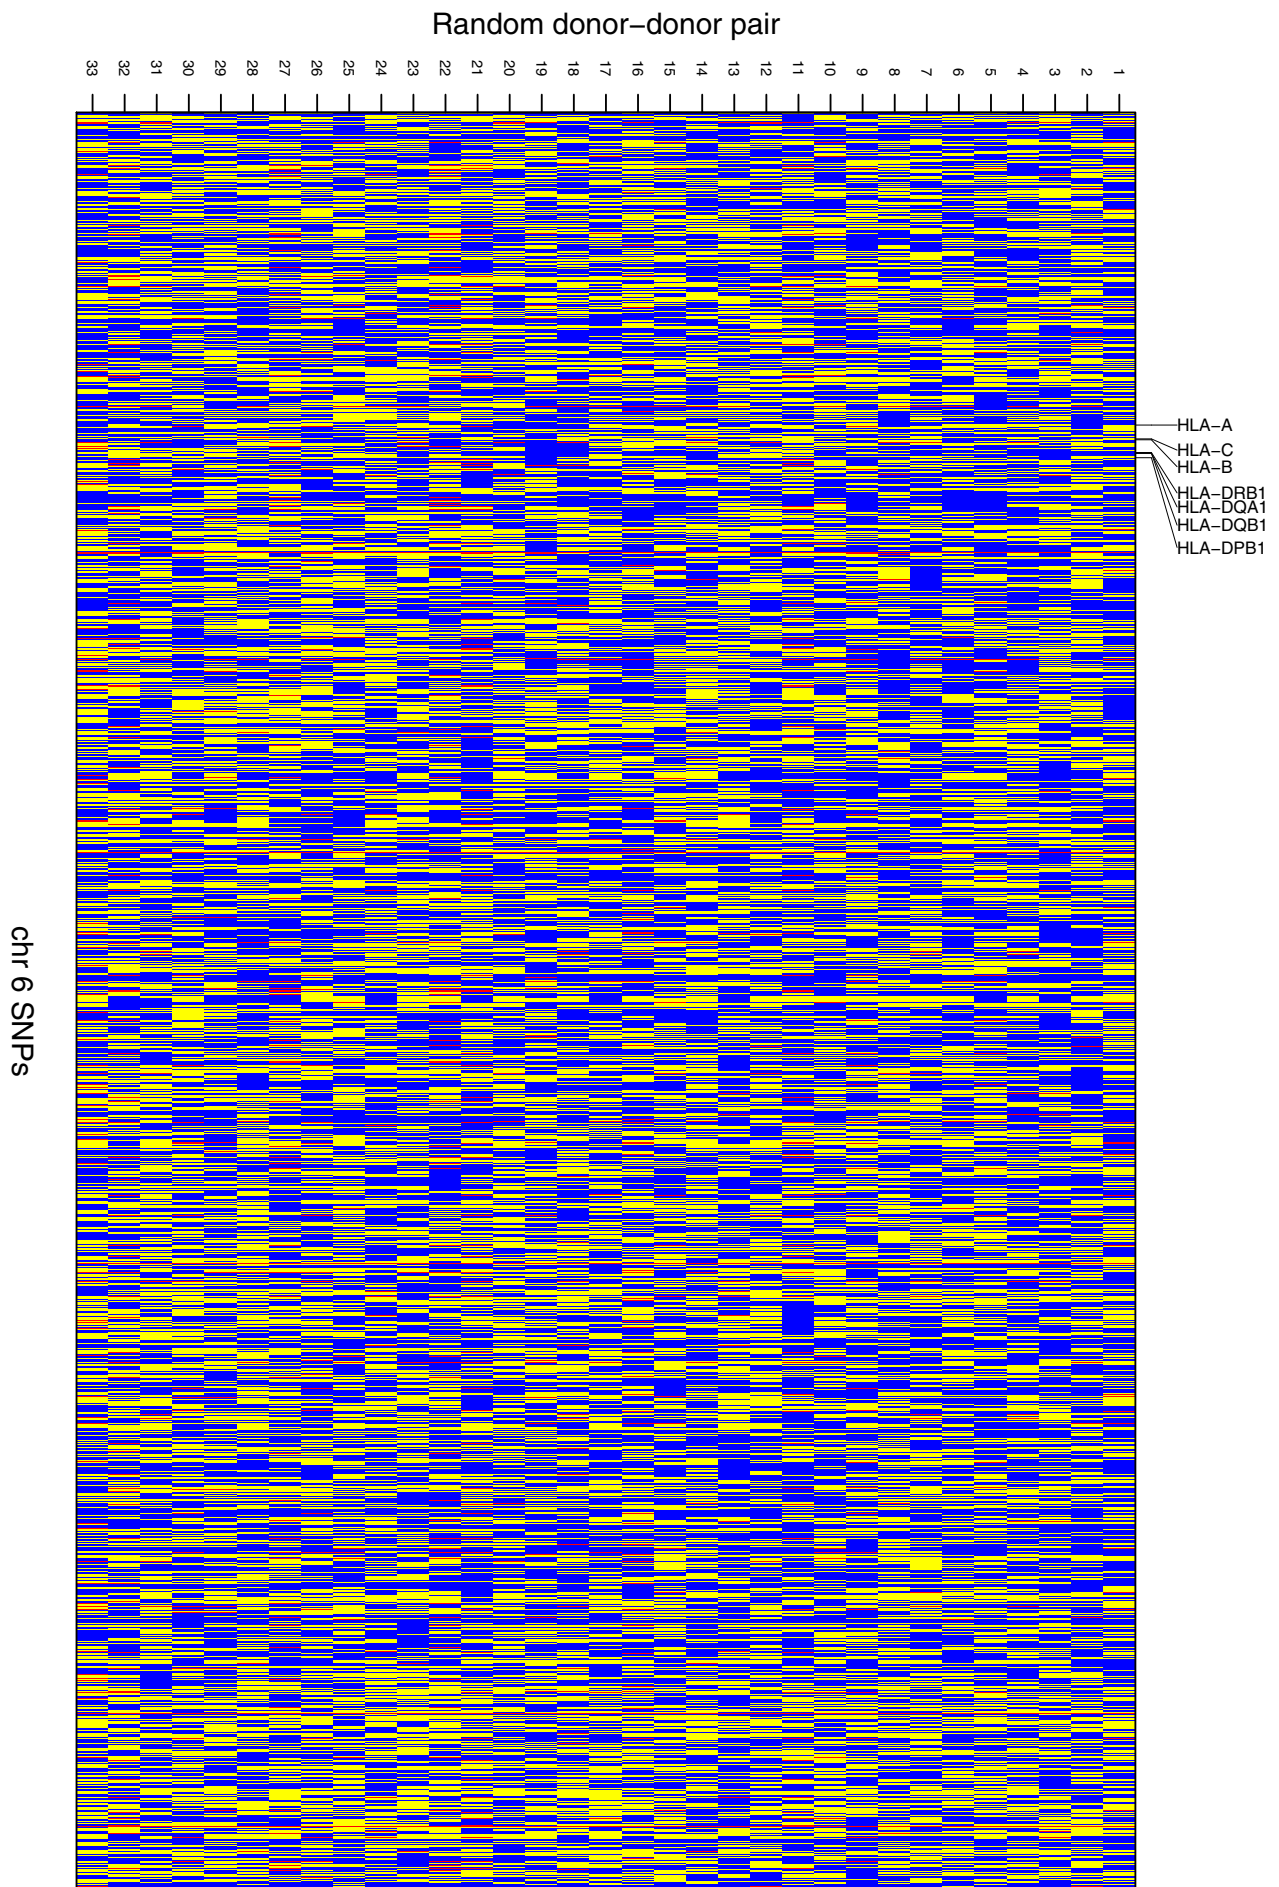

Online Supplementary Figure S2. The SNPs on chromosome 6 IBS between randomly selected donors. Blue stripes represent similar genotypes and yellow stripes different genotypes between donors. Red stripes are SNPs where genotyping of either sample was not successful and thus no similarity could be determined. Note: Markers in Figure S2 are not in physical scale; i.e. each blue, yellow or red 'stripe' represents one SNP, and the distance between neighbouring SNPs differs along the chromosome.
